# Supplementary material
Source: PubMed Central journal article supplement (PMC4407733)
Supplement: supp_mol.114.097550_Supplemental_97550.pdf [file supp_mol.114.097550_Supplemental_97550.pdf]

## **Supplemental Data**

Title: "Synthetic metallochaperone ZMC1 rescues mutant p53 conformation by transporting zinc into cells as an ionophore"

Authors: Adam R. Blanden, Xin Yu, Aaron J. Wolfe, John A. Gilleran, David J. Augeri, Ryan S. O'Dell, Eric C. Olson, S. David Kimball, Thomas J. Emge, Liviu Movileanu, Darren R. Carpizo, and Stewart N. Loh

Journal Title: Molecular Pharmacology.

Supplemental Data Contains:

Supplemental Methods

Supplemental Figures 1 and 2

Supplemental Tables 1-6

Legend for Supplemental Movies 1-10

References for Supplemental Data

## **SUPPLEMENTAL METHODS**

### **Liposome Preparation**

25 mg of 1,2-diphytanoyl-*sn*-glycero-3-phosphocholine (Avanti Polar Lipids, Alabaster, USA) was dissolved in chloroform. Solvent was evaporated in a round bottom flask by a steady stream of nitrogen. The flask was further dried in a vacuum overnight. The resulting film was hydrated with buffer (50 mM Tris pH 7.2, 100 mM NaCl) and fluorophore. Calcein and RhodZin-3 were

dissolved in 1 mL buffer to final concentrations of 10 mM and 10  $\mu$ M, respectively (Hee Dong, 2005). The lipid suspensions were extruded 15 times through a 100-nm polycarbonate filter using Avanti-mini extruder (MacDonald *et al.*, 1991). The solution was subjected to 5 cycles of freezing and thawing using liquid nitrogen, followed by an additional 15 cycles of extrusion (Hope *et al.*, 1985; Hee Dong, 2005). The fluorophore encapsulated liposomes were separated from free fluorophore by elution over a buffer equilibrated Sephadex-G25 column, and diluted to an  $OD_{600} = 0.06$  for use.

### **Synthesis and Crystallization of [Zn(ZMC1)<sub>2</sub>] complex**

To a suspension of ZMC1 (190.8 mg, .814 mmol, 1 equiv.) in EtOH (20 ml) was added ZnCl<sub>2</sub> (55.5 mg, 0.407 mmol, 0.5 equiv.). After 5 minutes, TEA (0.80 ml, excess) was added and the mixture was heated for 2 hours at reflux under nitrogen. Upon cooling to ambient temperature, a solid precipitated that was collected by filtration and washed with EtOH followed by Et<sub>2</sub>O. The solids were dried under high vacuum to give [Zn(ZMC1)<sub>2</sub>] (215 mg, 0.404 mmol, 99%) as a bright yellow solid. <sup>1</sup>H-NMR (400 MHz, DMSO-d<sub>6</sub>, C<sub>2</sub> symmetric complex, protons are doubled to account for two ZMC1 molecules in complex  $\delta$  2.26 (overlapping tt, J = 7.48Hz, 7.40Hz, 4H), 2.58 (s, 6H), 4.05 (m, 8H), 7.29 (dd, J = 7.28 Hz, 5.60 Hz, 2H), 7.75 (m, 4H), 7.88 (dt, J = 8.04 Hz, 1.52 Hz, 2H). Slow evaporation of [Zn(ZMC1)<sub>2</sub>] from a 1:1 mixture of DCM/MeOH afforded yellow crystals that were suitable for X-ray crystallography.

## SUPPLEMENTAL FIGURES AND TABLES

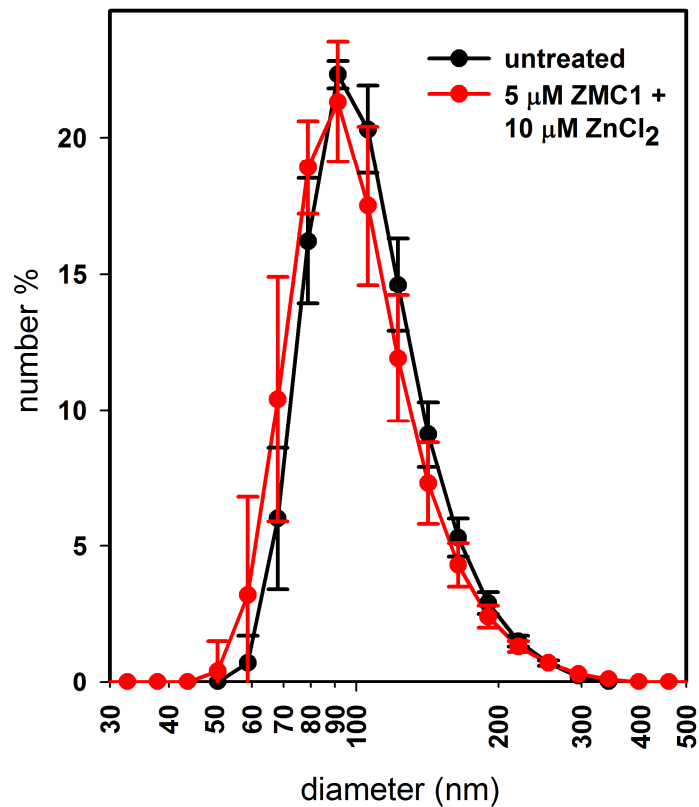

**Supplemental Figure 1. Liposome size distribution measured by Dynamic Light Scattering.**

Points are mean  $\pm$  SD for 6 sequential measurements. Cumulant mean diameters are  $141.59 \pm 1.73$  nm (untreated) and  $141.44 \pm 0.63$  nm ( $10 \mu\text{M ZnCl}_2 + 5 \mu\text{M ZMC1}$ ) (mean  $\pm$  SEM, n=6).

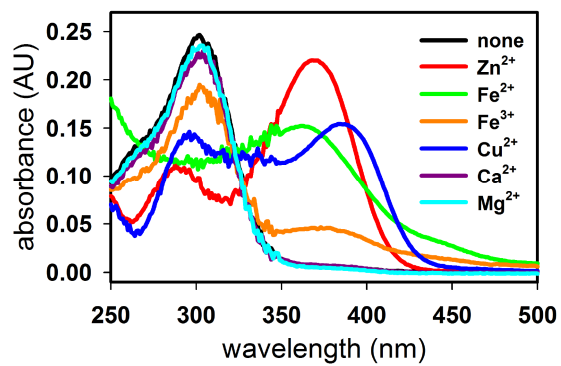

**Supplemental Figure 2. Absorbance spectra of ZMC1-metal ion complexes.** Concentrations were 100  $\mu$ M metal salt and 10  $\mu$ M ZMC1. Spectra are blanked against the corresponding metal salt solution.

**Supplemental Table 1. Crystal data and structure refinement for [Zn(ZMC1)<sub>2</sub>].**

|                                   |                                                                                                               |
|-----------------------------------|---------------------------------------------------------------------------------------------------------------|
| Identification code               | [Zn(ZMC1) <sub>2</sub> ]                                                                                      |
| Empirical formula                 | C <sub>23</sub> H <sub>28.5</sub> Cl <sub>11.5</sub> N <sub>8</sub> O <sub>0.25</sub> S <sub>2</sub> Zn       |
| Formula weight                    | 603.70                                                                                                        |
| Temperature                       | 100(2) K                                                                                                      |
| Wavelength                        | 0.71073 Å                                                                                                     |
| Crystal system                    | Monoclinic                                                                                                    |
| Space group                       | C 2/c                                                                                                         |
| Unit cell dimensions              | a = 14.2570(16) Å      α = 90°.<br>b = 11.4474(13) Å      β = 108.496(2)°.<br>c = 17.1560(19) Å      γ = 90°. |
| Volume                            | 2655.3(5) Å <sup>3</sup>                                                                                      |
| Z                                 | 4                                                                                                             |
| Density (calculated)              | 1.510 Mg/m <sup>3</sup>                                                                                       |
| Absorption coefficient            | 1.264 mm <sup>-1</sup>                                                                                        |
| F(000)                            | 1248                                                                                                          |
| Crystal size                      | 0.39 x 0.09 x 0.05 mm <sup>3</sup>                                                                            |
| Theta range for data collection   | 2.331 to 30.546°.                                                                                             |
| Index ranges                      | -20 ≤ h ≤ 20, -16 ≤ k ≤ 16, -24 ≤ l ≤ 24                                                                      |
| Reflections collected             | 14552                                                                                                         |
| Independent reflections           | 4036 [R(int) = 0.0519]                                                                                        |
| Completeness to theta = 25.242°   | 99.9 %                                                                                                        |
| Absorption correction             | Semi-empirical from equivalents                                                                               |
| Max. and min. transmission        | 0.7461 and 0.6266                                                                                             |
| Refinement method                 | Full-matrix least-squares on F <sup>2</sup>                                                                   |
| Data / restraints / parameters    | 4036 / 1 / 174                                                                                                |
| Goodness-of-fit on F <sup>2</sup> | 1.049                                                                                                         |
| Final R indices [I > 2σ(I)]       | R1 = 0.0494, wR2 = 0.1063                                                                                     |
| R indices (all data)              | R1 = 0.0666, wR2 = 0.1129                                                                                     |
| Extinction coefficient            | n/a                                                                                                           |
| Largest diff. peak and hole       | 0.740 and -0.591 e.Å <sup>-3</sup>                                                                            |

**Supplemental Table 2. Atomic coordinates ( $\times 10^4$ ) and equivalent isotropic displacement parameters ( $\text{\AA}^2 \times 10^3$ ) for  $[\text{Zn}(\text{ZMC1})_2]$ .  $U(\text{eq})$  is defined as one third of the trace of the orthogonalized  $U^{ij}$  tensor.**

|        | x        | y        | z         | $U(\text{eq})$ |
|--------|----------|----------|-----------|----------------|
| Zn(1)  | 0        | 6167(1)  | 2500      | 11(1)          |
| S(1)   | 1024(1)  | 7548(1)  | 3501(1)   | 17(1)          |
| N(1)   | -1128(2) | 4781(2)  | 2082(1)   | 14(1)          |
| N(2)   | -585(1)  | 5913(2)  | 3487(1)   | 11(1)          |
| N(3)   | -262(2)  | 6509(2)  | 4214(1)   | 14(1)          |
| N(4)   | 764(2)   | 7914(2)  | 4924(1)   | 23(1)          |
| C(1)   | -1418(2) | 4299(2)  | 1336(2)   | 19(1)          |
| C(2)   | -2215(2) | 3538(2)  | 1084(2)   | 25(1)          |
| C(3)   | -2709(2) | 3244(2)  | 1630(2)   | 25(1)          |
| C(4)   | -2404(2) | 3737(2)  | 2407(2)   | 20(1)          |
| C(5)   | -1609(2) | 4520(2)  | 2619(2)   | 13(1)          |
| C(6)   | -1262(2) | 5127(2)  | 3421(1)   | 13(1)          |
| C(7)   | -1660(2) | 4852(2)  | 4107(2)   | 22(1)          |
| C(8)   | 455(2)   | 7280(2)  | 4233(2)   | 15(1)          |
| C(9)   | 1448(2)  | 8893(2)  | 5169(2)   | 24(1)          |
| C(10)  | 1069(3)  | 9072(3)  | 5909(2)   | 34(1)          |
| C(11)  | 354(2)   | 8038(3)  | 5601(2)   | 26(1)          |
| C(12A) | 0        | -186(4)  | -2500     | 25(1)          |
| Cl(1A) | 1008(1)  | -1064(1) | -1946(1)  | 31(1)          |
| O(1B)  | -241(15) | -931(19) | -2615(14) | 50             |
| C(12B) | 580(20)  | -460(30) | -1889(16) | 50             |

**Supplemental Table 3. Bond lengths [Å] and angles [°] for [Zn(ZMC1)<sub>2</sub>].**

|                     |            |                     |            |
|---------------------|------------|---------------------|------------|
| Zn(1)-N(2)#1        | 2.1312(18) | C(5)-C(6)           | 1.479(3)   |
| Zn(1)-N(2)          | 2.1312(18) | C(6)-C(7)           | 1.494(3)   |
| Zn(1)-N(1)          | 2.210(2)   | C(7)-H(7A)          | 0.9600     |
| Zn(1)-N(1)#1        | 2.210(2)   | C(7)-H(7B)          | 0.9600     |
| Zn(1)-S(1)          | 2.4474(7)  | C(7)-H(7C)          | 0.9600     |
| Zn(1)-S(1)#1        | 2.4474(7)  | C(9)-C(10)          | 1.543(4)   |
| S(1)-C(8)           | 1.726(2)   | C(9)-H(9A)          | 0.9700     |
| N(1)-C(1)           | 1.333(3)   | C(9)-H(9B)          | 0.9700     |
| N(1)-C(5)           | 1.346(3)   | C(10)-C(11)         | 1.543(4)   |
| N(2)-C(6)           | 1.298(3)   | C(10)-H(10A)        | 0.9700     |
| N(2)-N(3)           | 1.367(3)   | C(10)-H(10B)        | 0.9700     |
| N(3)-C(8)           | 1.342(3)   | C(11)-H(11A)        | 0.9700     |
| N(4)-C(8)           | 1.340(3)   | C(11)-H(11B)        | 0.9700     |
| N(4)-C(9)           | 1.458(3)   | C(12A)-Cl(1A)#2     | 1.764(3)   |
| N(4)-C(11)          | 1.464(3)   | C(12A)-Cl(1A)       | 1.764(3)   |
| C(1)-C(2)           | 1.388(4)   | C(12A)-H(12A)       | 0.9700     |
| C(1)-H(1)           | 0.9300     | C(12A)-H(12B)       | 0.9700     |
| C(2)-C(3)           | 1.382(4)   | O(1B)-C(12B)        | 1.510(10)  |
| C(2)-H(2)           | 0.9300     | O(1B)-H(1B)         | 0.8200     |
| C(3)-C(4)           | 1.384(4)   | C(12B)-H(12C)       | 0.9600     |
| C(3)-H(3)           | 0.9300     | C(12B)-H(12D)       | 0.9600     |
| C(4)-C(5)           | 1.400(3)   | C(12B)-H(12E)       | 0.9600     |
| C(4)-H(4)           | 0.9300     |                     |            |
|                     |            |                     |            |
| N(2)#1-Zn(1)-N(2)   | 164.32(10) | N(2)#1-Zn(1)-S(1)#1 | 80.08(5)   |
| N(2)#1-Zn(1)-N(1)   | 94.12(7)   | N(2)-Zn(1)-S(1)#1   | 110.40(5)  |
| N(2)-Zn(1)-N(1)     | 74.48(7)   | N(1)-Zn(1)-S(1)#1   | 91.46(6)   |
| N(2)#1-Zn(1)-N(1)#1 | 74.48(7)   | N(1)#1-Zn(1)-S(1)#1 | 154.46(5)  |
| N(2)-Zn(1)-N(1)#1   | 94.12(7)   | S(1)-Zn(1)-S(1)#1   | 99.48(3)   |
| N(1)-Zn(1)-N(1)#1   | 88.25(11)  | C(8)-S(1)-Zn(1)     | 94.68(9)   |
| N(2)#1-Zn(1)-S(1)   | 110.40(5)  | C(1)-N(1)-C(5)      | 119.7(2)   |
| N(2)-Zn(1)-S(1)     | 80.08(5)   | C(1)-N(1)-Zn(1)     | 125.53(17) |
| N(1)-Zn(1)-S(1)     | 154.46(5)  | C(5)-N(1)-Zn(1)     | 114.40(16) |
| N(1)#1-Zn(1)-S(1)   | 91.46(6)   | C(6)-N(2)-N(3)      | 116.85(19) |

|                  |            |                        |            |
|------------------|------------|------------------------|------------|
| C(6)-N(2)-Zn(1)  | 119.55(15) | N(3)-C(8)-S(1)         | 129.03(18) |
| N(3)-N(2)-Zn(1)  | 123.56(14) | N(4)-C(9)-C(10)        | 87.9(2)    |
| C(8)-N(3)-N(2)   | 112.58(19) | N(4)-C(9)-H(9A)        | 114.0      |
| C(8)-N(4)-C(9)   | 132.4(2)   | C(10)-C(9)-H(9A)       | 114.0      |
| C(8)-N(4)-C(11)  | 130.7(2)   | N(4)-C(9)-H(9B)        | 114.0      |
| C(9)-N(4)-C(11)  | 95.5(2)    | C(10)-C(9)-H(9B)       | 114.0      |
| N(1)-C(1)-C(2)   | 122.3(2)   | H(9A)-C(9)-H(9B)       | 111.2      |
| N(1)-C(1)-H(1)   | 118.9      | C(11)-C(10)-C(9)       | 89.0(2)    |
| C(2)-C(1)-H(1)   | 118.9      | C(11)-C(10)-H(10A)     | 113.8      |
| C(3)-C(2)-C(1)   | 119.0(3)   | C(9)-C(10)-H(10A)      | 113.8      |
| C(3)-C(2)-H(2)   | 120.5      | C(11)-C(10)-H(10B)     | 113.8      |
| C(1)-C(2)-H(2)   | 120.5      | C(9)-C(10)-H(10B)      | 113.8      |
| C(2)-C(3)-C(4)   | 118.8(2)   | H(10A)-C(10)-H(10B)    | 111.0      |
| C(2)-C(3)-H(3)   | 120.6      | N(4)-C(11)-C(10)       | 87.6(2)    |
| C(4)-C(3)-H(3)   | 120.6      | N(4)-C(11)-H(11A)      | 114.0      |
| C(3)-C(4)-C(5)   | 119.5(2)   | C(10)-C(11)-H(11A)     | 114.0      |
| C(3)-C(4)-H(4)   | 120.2      | N(4)-C(11)-H(11B)      | 114.0      |
| C(5)-C(4)-H(4)   | 120.2      | C(10)-C(11)-H(11B)     | 114.0      |
| N(1)-C(5)-C(4)   | 120.7(2)   | H(11A)-C(11)-H(11B)    | 111.2      |
| N(1)-C(5)-C(6)   | 116.1(2)   | Cl(1A)#2-C(12A)-Cl(1A) | 110.6(3)   |
| C(4)-C(5)-C(6)   | 123.2(2)   | Cl(1A)#2-C(12A)-H(12A) | 109.5      |
| N(2)-C(6)-C(5)   | 115.2(2)   | Cl(1A)-C(12A)-H(12A)   | 109.5      |
| N(2)-C(6)-C(7)   | 122.4(2)   | Cl(1A)#2-C(12A)-H(12B) | 109.5      |
| C(5)-C(6)-C(7)   | 122.4(2)   | Cl(1A)-C(12A)-H(12B)   | 109.5      |
| C(6)-C(7)-H(7A)  | 109.5      | H(12A)-C(12A)-H(12B)   | 108.1      |
| C(6)-C(7)-H(7B)  | 109.5      | C(12B)-O(1B)-H(1B)     | 109.5      |
| H(7A)-C(7)-H(7B) | 109.5      | O(1B)-C(12B)-H(12C)    | 109.5      |
| C(6)-C(7)-H(7C)  | 109.5      | O(1B)-C(12B)-H(12D)    | 109.5      |
| H(7A)-C(7)-H(7C) | 109.5      | H(12C)-C(12B)-H(12D)   | 109.5      |
| H(7B)-C(7)-H(7C) | 109.5      | O(1B)-C(12B)-H(12E)    | 109.5      |
| N(4)-C(8)-N(3)   | 114.3(2)   | H(12C)-C(12B)-H(12E)   | 109.5      |
| N(4)-C(8)-S(1)   | 116.65(19) | H(12D)-C(12B)-H(12E)   | 109.5      |

---

Symmetry transformations used to generate equivalent atoms: #1 -x,y,-z+1/2 #2 -x,y,-z-1/2



**Supplemental Table 4. Anisotropic displacement parameters ( $\text{\AA}^2 \times 10^3$ ) for  $[\text{Zn}(\text{ZMC1})_2]$ . The anisotropic displacement factor exponent takes the form:  $-2\pi^2 [ h^2 a^{*2} U^{11} + \dots + 2 h k a^* b^* U^{12} ]$**

|        | $U^{11}$ | $U^{22}$ | $U^{33}$ | $U^{23}$ | $U^{13}$ | $U^{12}$ |
|--------|----------|----------|----------|----------|----------|----------|
| Zn(1)  | 12(1)    | 12(1)    | 10(1)    | 0        | 6(1)     | 0        |
| S(1)   | 18(1)    | 19(1)    | 14(1)    | -3(1)    | 7(1)     | -7(1)    |
| N(1)   | 15(1)    | 13(1)    | 13(1)    | -1(1)    | 3(1)     | -2(1)    |
| N(2)   | 11(1)    | 12(1)    | 11(1)    | 1(1)     | 4(1)     | 1(1)     |
| N(3)   | 16(1)    | 15(1)    | 10(1)    | -2(1)    | 4(1)     | -1(1)    |
| N(4)   | 31(1)    | 26(1)    | 16(1)    | -9(1)    | 12(1)    | -12(1)   |
| C(1)   | 25(1)    | 18(1)    | 15(1)    | -3(1)    | 8(1)     | -5(1)    |
| C(2)   | 30(2)    | 23(1)    | 20(1)    | -8(1)    | 4(1)     | -8(1)    |
| C(3)   | 26(1)    | 20(1)    | 28(2)    | -6(1)    | 6(1)     | -10(1)   |
| C(4)   | 19(1)    | 18(1)    | 25(1)    | 1(1)     | 10(1)    | -6(1)    |
| C(5)   | 14(1)    | 11(1)    | 15(1)    | 2(1)     | 6(1)     | 1(1)     |
| C(6)   | 14(1)    | 13(1)    | 12(1)    | 1(1)     | 5(1)     | 1(1)     |
| C(7)   | 24(1)    | 25(1)    | 19(1)    | -2(1)    | 12(1)    | -8(1)    |
| C(8)   | 16(1)    | 14(1)    | 13(1)    | 0(1)     | 4(1)     | 1(1)     |
| C(9)   | 28(1)    | 21(1)    | 21(1)    | -7(1)    | 7(1)     | -7(1)    |
| C(10)  | 49(2)    | 33(2)    | 25(2)    | -16(1)   | 16(2)    | -14(1)   |
| C(11)  | 36(2)    | 28(2)    | 18(1)    | -8(1)    | 14(1)    | -7(1)    |
| C(12A) | 29(3)    | 11(2)    | 33(3)    | 0        | 9(2)     | 0        |
| Cl(1A) | 27(1)    | 34(1)    | 31(1)    | 9(1)     | 6(1)     | 5(1)     |

**Supplemental Table 5. Hydrogen coordinates ( $\times 10^4$ ) and isotropic displacement parameters ( $\text{\AA}^2 \times 10^{-3}$ ) for  $[\text{Zn}(\text{ZMC1})_2]$ .**

|        | x     | y     | z     | U(eq) |
|--------|-------|-------|-------|-------|
| H(1)   | -1074 | 4479  | 973   | 23    |
| H(2)   | -2413 | 3230  | 554   | 30    |
| H(3)   | -3237 | 2724  | 1479  | 30    |
| H(4)   | -2725 | 3549  | 2785  | 24    |
| H(7A)  | -1126 | 4640  | 4588  | 32    |
| H(7B)  | -2119 | 4214  | 3950  | 32    |
| H(7C)  | -1993 | 5526  | 4225  | 32    |
| H(9A)  | 1300  | 9537  | 4781  | 28    |
| H(9B)  | 2139  | 8673  | 5319  | 28    |
| H(10A) | 1567  | 8935  | 6437  | 41    |
| H(10B) | 740   | 9815  | 5904  | 41    |
| H(11A) | 482   | 7376  | 5973  | 31    |
| H(11B) | -340  | 8254  | 5428  | 31    |
| H(12A) | -198  | 311   | -2122 | 30    |
| H(12B) | 198   | 311   | -2878 | 30    |
| H(1B)  | -251  | -1646 | -2591 | 75    |
| H(12C) | 1072  | -98   | -2079 | 75    |
| H(12D) | 872   | -1094 | -1525 | 75    |
| H(12E) | 313   | 101   | -1602 | 75    |

**Supplemental Table 6. Torsion angles [°] for [Zn(ZMC1)<sub>2</sub>].**

---

|                      |            |                       |           |
|----------------------|------------|-----------------------|-----------|
| C(6)-N(2)-N(3)-C(8)  | 178.3(2)   | C(4)-C(5)-C(6)-N(2)   | -173.1(2) |
| Zn(1)-N(2)-N(3)-C(8) | 0.7(3)     | N(1)-C(5)-C(6)-C(7)   | -174.5(2) |
| C(5)-N(1)-C(1)-C(2)  | 0.8(4)     | C(4)-C(5)-C(6)-C(7)   | 7.0(4)    |
| Zn(1)-N(1)-C(1)-C(2) | -171.8(2)  | C(9)-N(4)-C(8)-N(3)   | -173.9(3) |
| N(1)-C(1)-C(2)-C(3)  | -1.8(4)    | C(11)-N(4)-C(8)-N(3)  | -10.7(4)  |
| C(1)-C(2)-C(3)-C(4)  | 1.3(4)     | C(9)-N(4)-C(8)-S(1)   | 6.5(4)    |
| C(2)-C(3)-C(4)-C(5)  | 0.2(4)     | C(11)-N(4)-C(8)-S(1)  | 169.6(2)  |
| C(1)-N(1)-C(5)-C(4)  | 0.8(4)     | N(2)-N(3)-C(8)-N(4)   | 177.5(2)  |
| Zn(1)-N(1)-C(5)-C(4) | 174.12(18) | N(2)-N(3)-C(8)-S(1)   | -2.9(3)   |
| C(1)-N(1)-C(5)-C(6)  | -177.8(2)  | Zn(1)-S(1)-C(8)-N(4)  | -177.3(2) |
| Zn(1)-N(1)-C(5)-C(6) | -4.5(3)    | Zn(1)-S(1)-C(8)-N(3)  | 3.1(2)    |
| C(3)-C(4)-C(5)-N(1)  | -1.2(4)    | C(8)-N(4)-C(9)-C(10)  | 168.2(3)  |
| C(3)-C(4)-C(5)-C(6)  | 177.3(2)   | C(11)-N(4)-C(9)-C(10) | 0.9(2)    |
| N(3)-N(2)-C(6)-C(5)  | 178.62(19) | N(4)-C(9)-C(10)-C(11) | -0.9(2)   |
| Zn(1)-N(2)-C(6)-C(5) | -3.7(3)    | C(8)-N(4)-C(11)-C(10) | -168.5(3) |
| N(3)-N(2)-C(6)-C(7)  | -1.5(3)    | C(9)-N(4)-C(11)-C(10) | -0.9(2)   |
| Zn(1)-N(2)-C(6)-C(7) | 176.21(18) | C(9)-C(10)-C(11)-N(4) | 0.9(2)    |
| N(1)-C(5)-C(6)-N(2)  | 5.4(3)     |                       |           |

---

Symmetry transformations used to generate equivalent atoms: #1 -x,y,-z+1/2 #2 -x,y,-z-1/2

## LEGEND FOR SUPPLEMENTAL MOVIES 1-10

### Supplemental Movies 1-10. Zn<sup>2+</sup> Import Measurement by Time Lapse Microscopy.

HEK293 (S1-S5) and TOV112D (S6-S10) were incubated with 1  $\mu\text{M}$  FluoZin-3-AM at 37 °C for 40 min, exchanged into Ca<sup>2+</sup>- and Mg<sup>2+</sup>-free EBSS, and monitored by confocal microscopy. A baseline was recorded for ~90 s, at which point the cells were exchanged into EBSS containing the indicated treatments. 50  $\mu\text{M}$  PYR/ZnCl<sub>2</sub> and 100  $\mu\text{M}$  TPEN were used as positive controls and negative controls, respectively, in movies S1 and S6. DMSO (0.2%) was used as a vehicle control. Images were captured using a 10x (NA = 0.3) air objective. Quantification seen in Fig. 3A. The movies are: **1)** HEK293, 50  $\mu\text{M}$  PYR/ZnCl<sub>2</sub> then 100  $\mu\text{M}$  TPEN. **2)** HEK293, 1  $\mu\text{M}$  ZMC1. **3)** HEK293, 10  $\mu\text{M}$  ZnCl<sub>2</sub> + 0.2% DMSO. **4)** HEK293, 1  $\mu\text{M}$  ZMC1 + 10  $\mu\text{M}$  ZnCl<sub>2</sub>. **5)** HEK293, 1  $\mu\text{M}$  ZMC1 + 1  $\mu\text{M}$  ZnCl<sub>2</sub>. **6)** TOV112D, 50  $\mu\text{M}$  PYR/ZnCl<sub>2</sub> then 100  $\mu\text{M}$  TPEN. **7)** TOV112D, 1  $\mu\text{M}$  ZMC1. **8)** TOV112D, 10  $\mu\text{M}$  ZnCl<sub>2</sub> + 0.2% DMSO. **9)** TOV112D, 1  $\mu\text{M}$  ZMC1 + 10  $\mu\text{M}$  ZnCl<sub>2</sub>. **10)** TOV112D, 1  $\mu\text{M}$  ZMC1 + 1  $\mu\text{M}$  ZnCl<sub>2</sub>. We recommend VLC media player for viewing movies available at: <http://www.videolan.org/vlc/index.html>.

## REFERENCES FOR SUPPLEMENTAL DATA

Hee Dong TWK (2005) Release of calcein from temperature-sensitive liposomes in a poly (N-isopropylacrylamide) hydrogel. *Macromol Res* **13**:54–61.

Hope MJ, Bally MB, Webb G, and Cullis PR (1985) Production of large unilamellar vesicles by a rapid extrusion procedure. Characterization of size distribution, trapped volume and ability to maintain a membrane potential. *Biochim Biophys Acta BBA - Biomembr* **812**:55–65.

MacDonald RC, MacDonald RI, Menco BP, Takeshita K, Subbarao NK, and Hu LR (1991) Small-volume extrusion apparatus for preparation of large, unilamellar vesicles. *Biochim Biophys Acta* **1061**:297–303.
